# Supplementary material
Source: Research Square preprint supplement (doi:10.21203/rs.3.rs-9209927/v1)
Supplement: Supplementary file 1 [file 0ee9edf890a8d16752928557.pdf]

## Supplementary Material

### Targeting FGFR1 with aloperine suppresses angiogenesis, vasculogenic mimicry, and metastasis in triple-negative breast cancer

Tianci Tang<sup>1#</sup>, Luisa Müller<sup>1#</sup>, Yixuan Xu<sup>1</sup>, Matthias W. Laschke<sup>1</sup>, Yuan Gu<sup>1\*</sup>

<sup>1</sup>Institute for Clinical and Experimental Surgery, Saarland University, PhramaScienceHub (PSH), 66421 Homburg, Germany

# These authors contributed equally.

#### **\*Corresponding author:**

Yuan Gu, Ph.D.  
Institute for Clinical and Experimental Surgery  
Saarland University  
66421 Homburg  
Germany

phone: +49 6841 162 6368  
fax: +49 6841 162 6553  
e-mail: yuan.gu@uks.eu

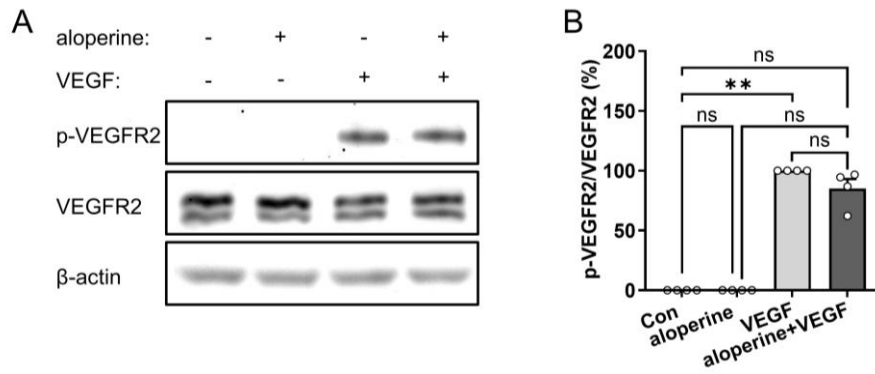

**Supplementary Fig. 1** Effects of aloperine on the protein levels of p-VEGFR2 and VEGFR2 in HUVECs. **A:** Representative Western blots showing p-VEGFR2, VEGFR2, and  $\beta$ -actin expression in HUVECs that were treated with 0.1% DMSO (Con) or 100  $\mu$ M aloperine for 4 h and then stimulated with or without 50 ng/mL VEGF for another 7 min. **B:** Expression levels (% of control) of p-VEGFR2/VEGFR2 in treated HUVECs depicted in (A), as assessed by Western blotting (n = 4 independent experiments). Data are presented as Means  $\pm$  SEM. \*\*\* $P < 0.001$ ; ns, not significant.

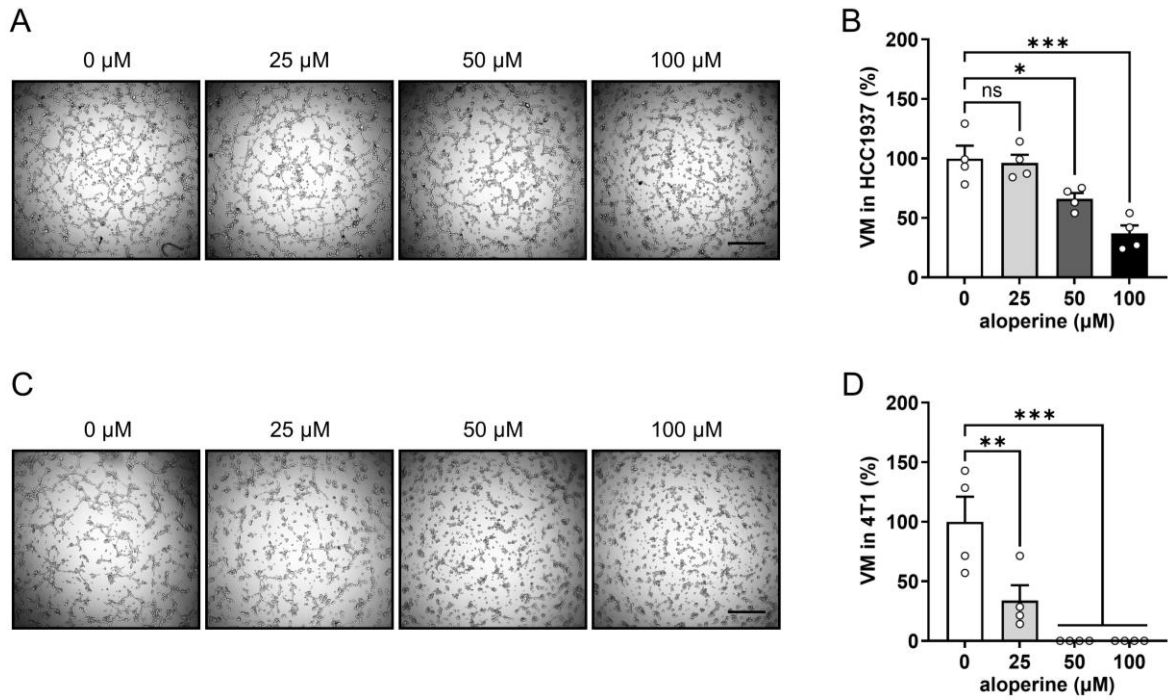

**Supplementary Fig. 2** Aloperine inhibits VM in HCC1937 and 4T1 cells. **A:** Representative images of tube-forming HCC1937 cells that were treated for 18 h with 0, 25, 50, and 100  $\mu\text{M}$  aloperine. Scale bar: 500  $\mu\text{m}$ . **B:** VM (% of 0  $\mu\text{M}$ ) in treated HCC1937 cells depicted in (A), as assessed by tube formation assay ( $n = 4$ ). **C:** Representative images of tube-forming 4T1 cells that were treated for 18 h with 0, 25, 50, and 100  $\mu\text{M}$  aloperine. Scale bar: 500  $\mu\text{m}$ . **D:** VM (% of 0  $\mu\text{M}$ ) in treated 4T1 cells depicted in (C), as assessed by tube formation assay ( $n = 4$ ). Data are presented as Means  $\pm$  SEM. \* $P < 0.05$ , \*\* $P < 0.01$ , \*\*\* $P < 0.001$ ; ns, not significant.

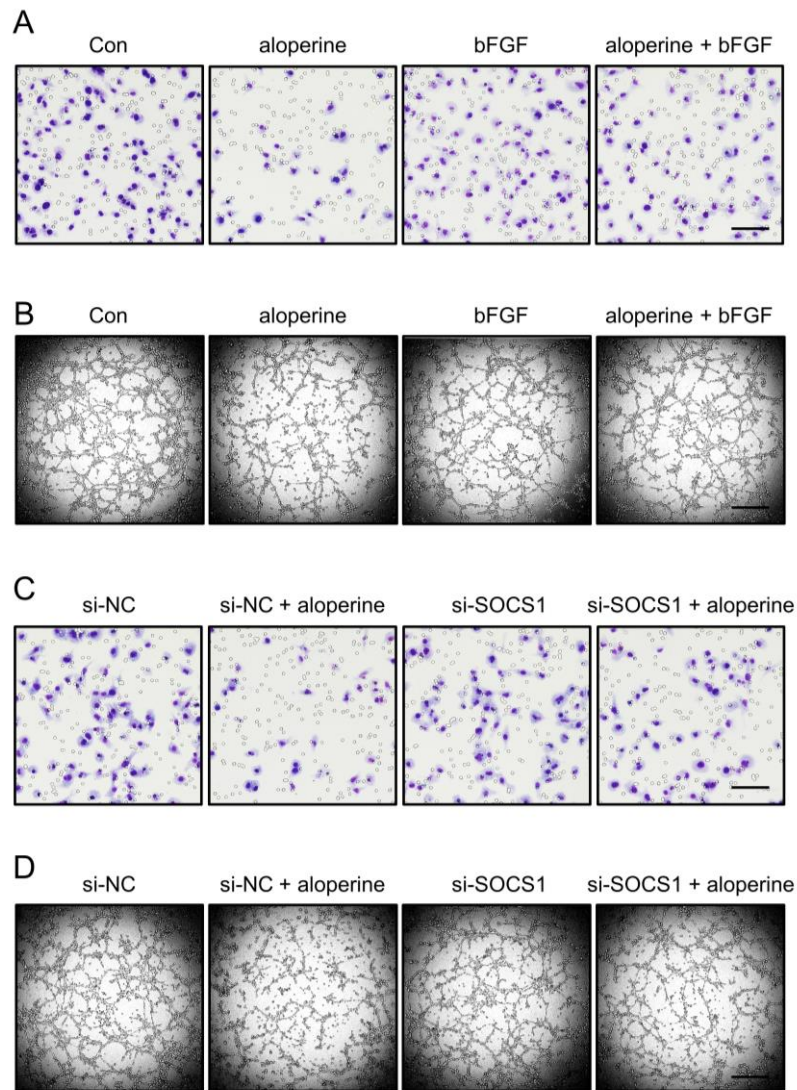

**Supplementary Fig. 3** Aloperine inhibits TNBC cell migration and VM formation by suppressing the FGFR1/JAK2/STAT3 signaling pathway. **A:** Representative images of migrated MDA-MB-231 cells. The cells were treated with 0.1% DMSO (vehicle) or 100  $\mu$ M aloperine for 18 h, then seeded into Transwell inserts and incubated with DMSO or aloperine in the absence or presence of 150 ng/mL bFGF for an additional 5 h. Scale bar: 100  $\mu$ m. **B:** Representative images of tube-forming MDA-MB-231 cells that were treated for 18 h with 0.1% DMSO (Con) or 50  $\mu$ M aloperine in the absence or presence of 150 ng/mL bFGF. Scale bar: 500  $\mu$ m. **C:** Representative images of migrated MDA-MB-231 cells. The cells were transfected with si-NC or si-SOCS1 for 30 h followed by treatment with 0.1% DMSO (vehicle) or 100  $\mu$ M aloperine for 18 h. Cells were then seeded into Transwell inserts and incubated with DMSO or aloperine for an additional 5 h. Scale bar: 100  $\mu$ m. **D:** Representative images of tube-forming MDA-MB-231 cells. The cells were transfected with si-NC or si-SOCS1 for 48 h, then seeded onto Matrigel-coated plates and treated with 0.1% DMSO (vehicle) or 50  $\mu$ M aloperine for an additional 18 h. Scale bar: 500  $\mu$ m.
